# Supplementary material
Source: PubMed Central journal article supplement (PMC4279733)
Supplement: ASN.2013101138_ASN2013101138SupplementaryData1.pdf [file ASN.2013101138_ASN2013101138SupplementaryData1.pdf]

1  
2  
3  
4  
5  
6  
7  
8  
9  
10  
11  
12  
13  
14  
15  
16  
17  
18  
19  
20  
21  
22  
23  
24  
25  
26  
27  
28  
29  
30  
31  
32  
33  
34  
35  
36  
37  
38  
39  
40  
41  
42  
43  
44  
45  
46  
47  
48  
49  
50  
51  
52  
53  
54  
55  
56  
57  
58  
59  
60

Suppl. Table S1.

Prediction of TKV stereology (TKVs) by  
TKV ellipsoid (TKVe)

|                     | R-Square      | Coeff Var     | Root MSE      | PRESS Statistic |
|---------------------|---------------|---------------|---------------|-----------------|
| TKVe coronal        | 0.9997        | 1.6201        | 0.1668        | 17.112          |
| TKVe sagittal       | 0.9998        | 1.5441        | 0.1590        | 15.544          |
| <b>TKVe average</b> | <b>0.9998</b> | <b>1.4180</b> | <b>0.1460</b> | <b>13.109</b>   |

For Peer Review

### **Comparison of TKV stereology (TKVs) measurements with MR or CT images**

We identified 43 patients who had abdominal CT and MR images obtained within 15 days. Axial non-contrast CT and MR images, of 5-10 mm, were used to calculate TKVs, using Analyze software. TKV measurements from CT and MRI were strongly correlated ( $R^2=0.9998$ , Supplementary Figure S3A). A plot of the % difference between the measurements against their mean is more informative to assess between measurements differences (Supplementary Figure S3B). The mean % difference in TKV was  $0.29\pm 1.68$ . Difference in TKV (MRI-CT) was within 3.1% below to 3.6% above true TKV (MRI, CT mean). This is less than the annual mean increase of 5.3% reported in ADPKD. The probability that an MRI-CT switch could account for a change of this magnitude is extremely small (0.0008). This data suggested that MRI and CT images could be used interchangeably if necessary to measure TKV.

1  
2  
3 **Classification of Class 1 ADPKD by HtTKV0 and age at HtTKV0.**  
4

5 Class 1 patients were stratified into five subclasses based on estimated kidney growth rates, <1.5 (subclass  
6  
7 1A), 1.5-3 (1B), 3-4.5 (1C), 4.5-6 (1D) or >6% (1E) (Supplemental Table S2).  
8  
9  
10  
11  
12  
13  
14  
15  
16  
17  
18  
19  
20  
21  
22  
23  
24  
25  
26  
27  
28  
29  
30  
31  
32  
33  
34  
35  
36  
37  
38  
39  
40  
41  
42  
43  
44  
45  
46  
47  
48  
49  
50  
51  
52  
53  
54  
55  
56  
57  
58  
59  
60

For Peer Review

Suppl. Table S2. Annual of the American Society of NEPHROLOGY

| Years | Class 1 A* | Class 1 B* | Class 1 C* | Class 1 D* | Class 1 E† |
|-------|------------|------------|------------|------------|------------|
| 15    | 188        | 234        | 290        | 359        | 359        |
| 16    | 190        | 241        | 303        | 381        | 381        |
| 17    | 193        | 248        | 317        | 404        | 404        |
| 18    | 196        | 255        | 331        | 428        | 428        |
| 19    | 199        | 263        | 346        | 454        | 454        |
| 20    | 202        | 271        | 362        | 481        | 481        |
| 21    | 205        | 279        | 378        | 510        | 510        |
| 22    | 208        | 287        | 395        | 541        | 541        |
| 23    | 211        | 296        | 413        | 573        | 573        |
| 24    | 214        | 305        | 431        | 607        | 607        |
| 25    | 218        | 314        | 451        | 644        | 644        |
| 26    | 221        | 323        | 471        | 682        | 682        |
| 27    | 224        | 333        | 492        | 723        | 723        |
| 28    | 228        | 343        | 514        | 767        | 767        |
| 29    | 231        | 353        | 538        | 813        | 813        |
| 30    | 234        | 364        | 562        | 862        | 862        |
| 31    | 238        | 375        | 587        | 913        | 913        |
| 32    | 242        | 386        | 613        | 968        | 968        |
| 33    | 245        | 398        | 641        | 1026       | 1026       |
| 34    | 249        | 410        | 670        | 1088       | 1088       |
| 35    | 253        | 422        | 700        | 1153       | 1153       |
| 36    | 256        | 435        | 732        | 1222       | 1222       |
| 37    | 260        | 448        | 765        | 1295       | 1295       |
| 38    | 264        | 461        | 799        | 1373       | 1373       |
| 39    | 268        | 475        | 835        | 1456       | 1456       |
| 40    | 272        | 489        | 872        | 1543       | 1543       |
| 41    | 276        | 504        | 912        | 1635       | 1635       |
| 42    | 280        | 519        | 953        | 1734       | 1734       |
| 43    | 285        | 535        | 996        | 1838       | 1838       |
| 44    | 289        | 551        | 1040       | 1948       | 1948       |
| 45    | 293        | 567        | 1087       | 2065       | 2065       |
| 46    | 298        | 584        | 1136       | 2189       | 2189       |
| 47    | 302        | 602        | 1187       | 2320       | 2320       |
| 48    | 307        | 620        | 1241       | 2459       | 2459       |
| 49    | 311        | 638        | 1297       | 2607       | 2607       |
| 50    | 316        | 658        | 1355       | 2763       | 2763       |
| 51    | 321        | 677        | 1416       | 2929       | 2929       |
| 52    | 325        | 698        | 1480       | 3105       | 3105       |
| 53    | 330        | 719        | 1546       | 3291       | 3291       |
| 54    | 335        | 740        | 1616       | 3488       | 3488       |
| 55    | 340        | 762        | 1688       | 3698       | 3698       |
| 56    | 345        | 785        | 1764       | 3919       | 3919       |
| 57    | 350        | 809        | 1844       | 4155       | 4155       |
| 58    | 356        | 833        | 1927       | 4404       | 4404       |
| 59    | 361        | 858        | 2014       | 4668       | 4668       |
| 60    | 366        | 884        | 2104       | 4948       | 4948       |
| 61    | 372        | 910        | 2199       | 5245       | 5245       |
| 62    | 378        | 938        | 2298       | 5560       | 5560       |
| 63    | 383        | 966        | 2401       | 5893       | 5893       |
| 64    | 389        | 995        | 2509       | 6247       | 6247       |
| 65    | 395        | 1024       | 2622       | 6622       | 6622       |
| 66    | 401        | 1055       | 2740       | 7019       | 7019       |
| 67    | 407        | 1087       | 2863       | 7440       | 7440       |
| 68    | 413        | 1119       | 2992       | 7887       | 7887       |
| 69    | 419        | 1153       | 3127       | 8360       | 8360       |
| 70    | 425        | 1188       | 3268       | 8861       | 8861       |
| 71    | 432        | 1223       | 3415       | 9393       | 9393       |
| 72    | 438        | 1260       | 3568       | 9957       | 9957       |
| 73    | 445        | 1298       | 3729       | 10554      | 10554      |
| 74    | 451        | 1337       | 3897       | 11187      | 11187      |
| 75    | 458        | 1377       | 4072       | 11859      | 11859      |
| 76    | 465        | 1418       | 4255       | 12570      | 12570      |
| 77    | 472        | 1461       | 4447       | 13324      | 13324      |
| 78    | 479        | 1505       | 4647       | 14124      | 14124      |
| 79    | 486        | 1550       | 4856       | 14971      | 14971      |
| 80    | 494        | 1596       | 5075       | 15869      | 15869      |

\*Upper limits shown for classes A, B, C and D.

†Minimal values shown for Class 1E

Suppl. Table S3. Expected predicted error (EPE) in validation set

|                                                                    | EPE           |                                          |                                          |
|--------------------------------------------------------------------|---------------|------------------------------------------|------------------------------------------|
|                                                                    | All patients  | Patients<br><60mL/min/1.73m <sup>2</sup> | Patients<br>≥60mL/min/1.73m <sup>2</sup> |
|                                                                    | (eGFR)        | (eGFR)                                   | (eGFR)                                   |
| Class 1 patients by TKV<br>ellipsoid (TKVe)<br>Internal Validation | 181<br>(13.5) | 102<br>(10.1)                            | 261<br>(16.2)                            |
| Class 1 patients by TKV<br>ellipsoid (TKVe)<br>External Validation | 293<br>(17.1) | 221<br>(14.9)                            | 313<br>(17.7)                            |

Supplementary Table S4: Comparison between modeling eGFR with and without PKD classes using validation data.

| eGFR at baseline | Sensitivity for last eGFR ≤45: % TP (no. TPs) |                     | Specificity for last eGFR ≤45: % TN (no. TN) |                     | AUC last eGFR ≤45 vs. predicted |                     |
|------------------|-----------------------------------------------|---------------------|----------------------------------------------|---------------------|---------------------------------|---------------------|
|                  | With PKD Classes                              | Without PKD Classes | With PKD Classes                             | Without PKD Classes | With PKD Classes                | Without PKD Classes |
| All (n=333, 106) | 81.1 (86)                                     | 71.7 (76)           | 90.7 (206)                                   | 89.4 (203)          | 0.945                           | 0.929               |
| <60 (n=65, 61)   | 96.7 (59)                                     | 95.1 (58)           | 25.0 (1)                                     | 0.0 (0)             | 0.934                           | 0.900               |
| ≥60 (n=268, 45)  | 60.0 (27)                                     | 40.0 (18)           | 91.9 (205)                                   | 91.0 (203)          | 0.901                           | 0.864               |
| ≥70 (n=243, 36)  | 55.6 (20)                                     | 30.6 (11)           | 93.7 (194)                                   | 92.7 (192)          | 0.907                           | 0.873               |
| ≥80 (n=202, 23)  | 47.8 (11)                                     | 17.4 (4)            | 95.5 (171)                                   | 96.6 (173)          | 0.912                           | 0.883               |

Note: TN=true negative, TP=True positive.

Peer Review

Supplementary Table S5: Comparison of concordance statistics between modeling time to ESRD using baseline eGFR plus PKD class versus baseline eGFR alone.

| Concordance                    |                                       |               |
|--------------------------------|---------------------------------------|---------------|
| eGFR at baseline (ESRD events) | Baseline eGFR and PKD Class (ordinal) | Baseline eGFR |
| All (143)                      | 95.7                                  | 95.1          |
| ≥30 (74)                       | 92.5                                  | 90.6          |
| ≥60(21)                        | 97.4                                  | 73.6          |
| ≥70(13)                        | 87.9                                  | 73.3          |
| ≥80(10)                        | 89.9                                  | 77.5          |

Suppl. Table S6. Cox-regression model of time to ESRD for Class 1, typical ADPKD patients, controlling by eGFR at HtTKV0

|       |                | ESRD Hazard Ratio | 95% CI |       | p value |
|-------|----------------|-------------------|--------|-------|---------|
| Mayo  | eGFR at HtTKV0 | 0.909             | 0.896  | 0.921 | <0.0001 |
|       | Type 1 class   | 1.835             | 1.488  | 2.262 | <0.0001 |
| CRISP | eGFR at HtTKV0 | 0.90              | 0.83   | 0.97  | 0.0086  |
|       | Type 1 class   | 4.67              | 1.03   | 21.20 | 0.0458  |



**Web application to facilitate the estimation of TKVe and Class 1 subclassification**

A web application that allows a fast estimation of TKV based on the ellipsoid equation from simple MRI or CT measurements (Supplemental Figure S2) can be found at <http://www.mayo.edu/research/centers-programs/translational-polycystic-kidney-disease-pkd-center/overview>. Once TKV has been estimated (or if TKV has been already obtained by stereology technique) patient's classification can be obtained with additional input of patient's height and age at the time of TKV.

For Peer Review
